# Supplementary material for: ON-ICE trial: Investigation of the combined effects of oxytocin and naltrexone on stress-induced and alcohol cue-induced craving in alcohol use disorder–Study protocol of a phase II randomised double-blind placebo-controlled parallel-group trial
Source: HighWire-hosted journal article supplement (doi:10.1136/bmjopen-2021-059672), 2022-04-01
Supplement: bmjopen-2021-059672supp001_data_supplement.pdf [file bmjopen-2021-059672supp001_data_supplement.pdf]

## SUPPLEMENTS

**Supplementary Table S1:** Assumed cumulative distribution functions for the primary outcome,  $F_E(z)$  and  $F_C(z)$ , in experimental and control group under  $H_1$ 

| z        | 8   | 9   | 10  | 11  | 12  | 13  | 14  | 15  | 16  | 17  | 18  | 19  | 20  | 21  | 22  | 23  | 24  | 25-26 | 27  | 28-39 | 40-43 | 44-56 |
|----------|-----|-----|-----|-----|-----|-----|-----|-----|-----|-----|-----|-----|-----|-----|-----|-----|-----|-------|-----|-------|-------|-------|
| $F_E(z)$ | .02 | .12 | .43 | .47 | .49 | .57 | .61 | .69 | .80 | .84 | .86 | .90 | .90 | .92 | .92 | .94 | .98 | .98   | .98 | .98   | 1     | 1     |
| $F_C(z)$ | .00 | .00 | .00 | .00 | .02 | .12 | .43 | .47 | .49 | .57 | .61 | .69 | .80 | .84 | .86 | .90 | .90 | .92   | .94 | .98   | .98   | 1     |
